# Supplementary material for: The visible light-driven highly efficient photocatalytic properties of Cu2ZnSnS4 nanoparticles synthesized by a hydrothermal method
Source: Royal Society of Chemistry journal article supplement (doi:10.1039/d0nj05250g), 2020-12-14
Supplement: d0nj05250g2.pdf [file d0nj05250g2.pdf]

Electronic Supplementary Material (ESI) for New Journal of Chemistry.

This journal is © The Royal Society of Chemistry and the Centre National de la Recherche Scientifique 2020

## **Supporting Information**

### **Visible light driven high-efficient photocatalytic property of $\text{Cu}_2\text{ZnSnS}_4$ nanoparticles synthesized by hydrothermal method**

Zhangchen Hou, Yufang Li\*, Jinsong Liu, Honglie Shen, Xiaomin Huo

College of Materials Science and Technology, Jiangsu Key Laboratory of Materials and  
Technology for Energy Conversion, Nanjing University of Aeronautics and Astronautics, Nanjing,  
210016, PR China

\* Corresponding author: lyf\_msc@nuaa.edu.cn (Y.F. Li)

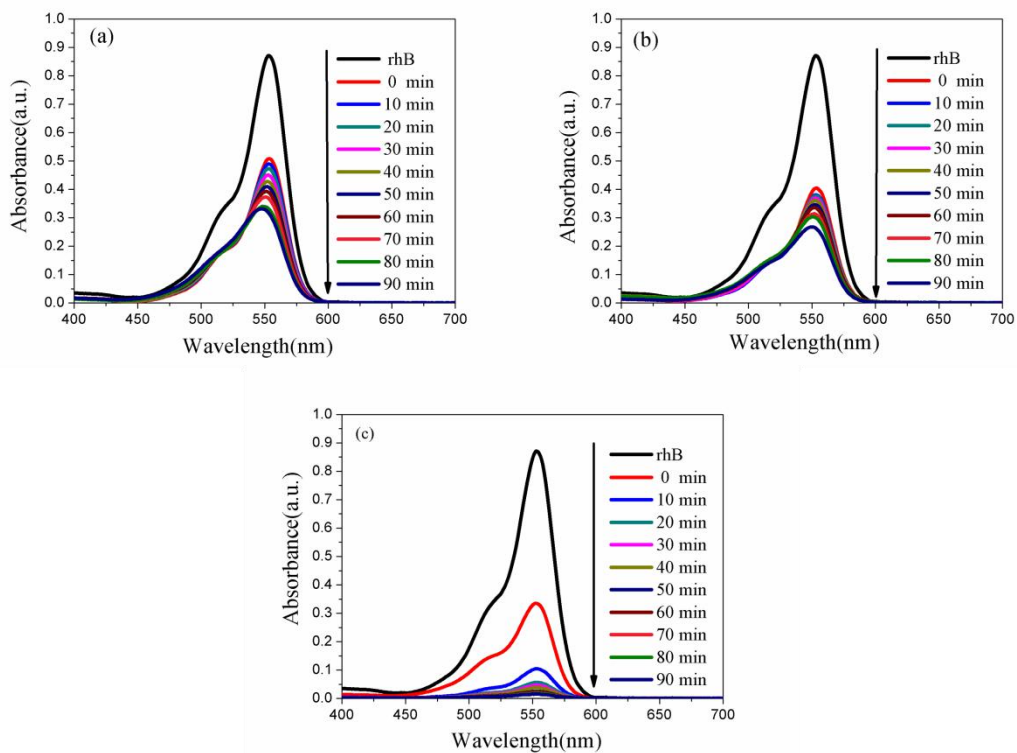

**Fig.S1.** Time-dependent UV-Vis absorption spectra of RhB solution under stimulated Vis irradiation of CZTS samples prepared at (a) 160°C, (b) 180°C and (c) 200°C.

**Table S1.** Pseudo first-order kinetics equation and coefficient constant of the catalytic photodecomposition of RhB pollutants.

| Sample     | First order kinetics equation | Coefficient constant ( $R^2$ ) |
|------------|-------------------------------|--------------------------------|
| rhB        | $y=0.000454t - 0.000323$      | 0.93751                        |
| 160°C-CZTS | $y=0.00527t + 0.51297$        | 0.97999                        |
| 180°C-CZTS | $y=0.00411t + 0.74867$        | 0.91187                        |
| 200°C-CZTS | $y=0.02905t + 1.77020$        | 0.82890                        |

A 10mg/L BPA solution was prepared. For each photocatalysis experiment, 100 mL of BPA solution was measured, and then a 50 mg CZTS sample was added and stirred in a dark environment for 60 minutes. After starting the light, 6 mL of the solution was taken in the centrifuge tube every 30 minutes, and the light stopped after 120 minutes. Finally, the removed solution was centrifuged in an extractor at 10000rad/min for 3 minutes, and the supernatant was taken for UV-vis spectrum analysis. The results were shown in Fig. S2, Fig. S3 and table S2.

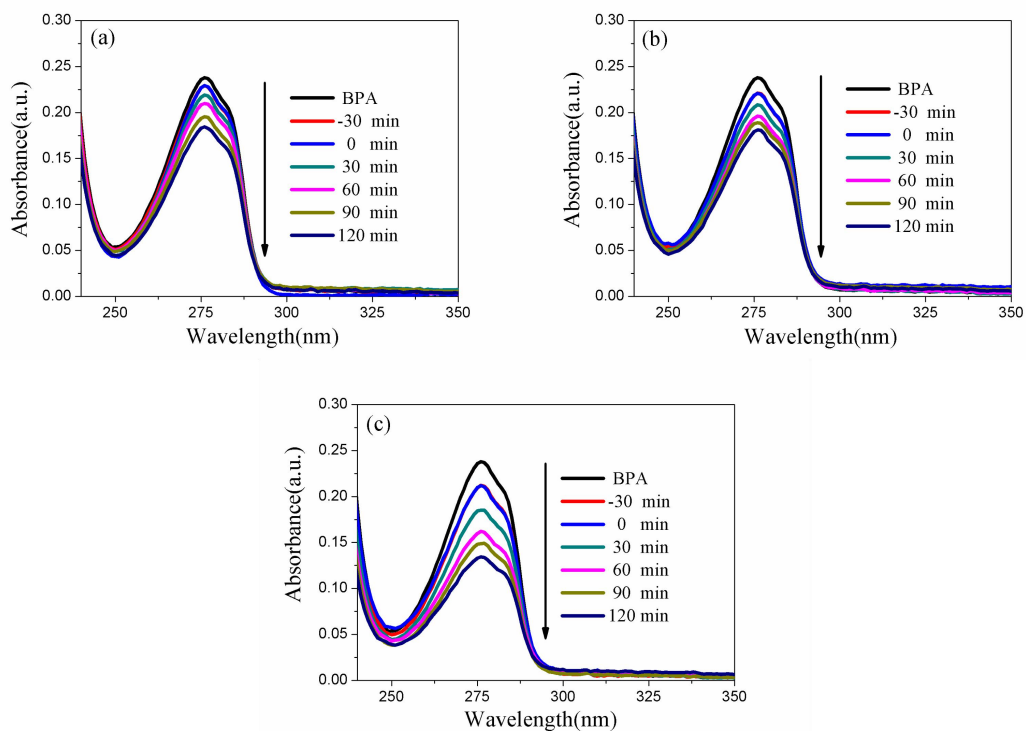

**Fig.S2.** Time-dependent UV-Vis absorption spectra of BPA solution under stimulated Vis irradiation of CZTS samples prepared at (a) 160°C, (b) 180°C and (c) 200°C.

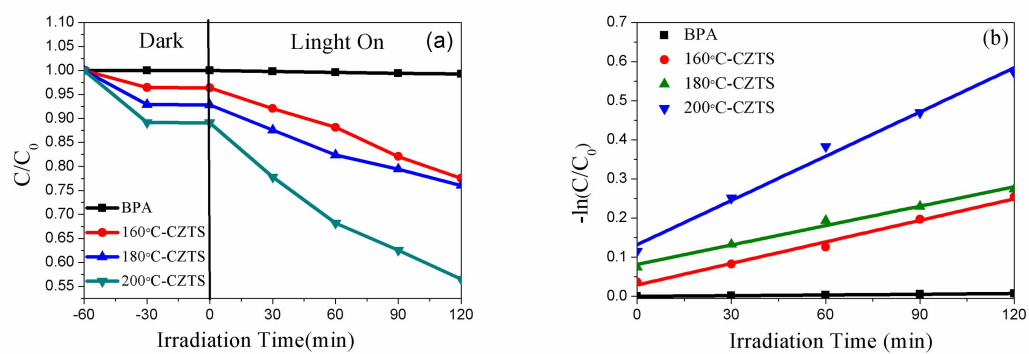

**Fig.S3.** Photocatalytic degradation rate of BPA by CZTS samples at different temperatures.

**Table S2.** Pseudo first-order kinetics equation and coefficient constant of the catalytic photodecomposition of BPA.

| Sample     | First order kinetics equation | Coefficient constant ( $R^2$ ) |
|------------|-------------------------------|--------------------------------|
| BPA        | $y=0.000031t - 0.000003$      | 0.99789                        |
| 160°C-CZTS | $y=0.00184t + 0.02915$        | 0.98869                        |
| 180°C-CZTS | $y=0.00166t + 0.08160$        | 0.98595                        |
| 200°C-CZTS | $y=0.00377t + 0.13201$        | 0.98860                        |

**Table S3.** The TOC removal efficiency (Mineralization degree) of RhB in aqueous solution for the CZTS prepared at 200°C after visible light irradiation for 90 min.

| Sample         | TOC (mg/L) | IC(mg/L) | TC(mg/L) | Mineralization degree (%) |
|----------------|------------|----------|----------|---------------------------|
| Before         | 11.365     | 0.4100   | 11.775   |                           |
| Photocatalysis |            |          |          | 61.37                     |
| After          | 4.390      | 0.4902   | 4.880    |                           |
| Photocatalysis |            |          |          |                           |

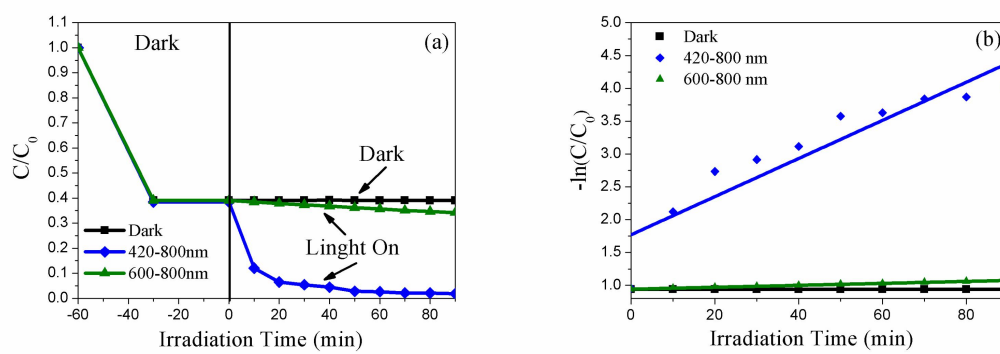

**Fig.S4.** Photocatalytic degradation rate of RhB by CZTS prepared at 200°C under different wavelengths of light irradiation.



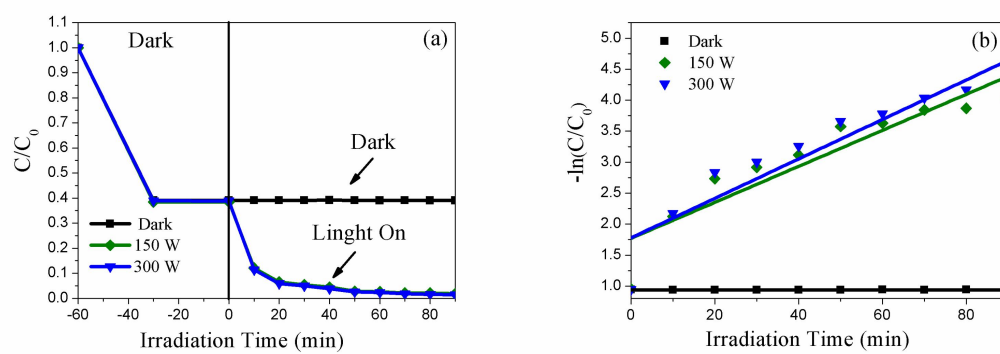

**Fig.S5.** Photocatalytic degradation rate of RhB by CZTS prepared at 200°C under different powers of light irradiation.

**Table S4.** Pseudo first-order kinetics equation and coefficient constant of the catalytic photodecomposition of RhB under different irradiation powers.

| Power | First order kinetics equation | Coefficient constant ( $R^2$ ) |
|-------|-------------------------------|--------------------------------|
| 150W  | $y=0.02905t + 1.77020$        | 0.82890                        |
| 300W  | $y=0.03185t + 1.77758$        | 0.85349                        |

**Table S5.** Data comparison of RhB photocatalysis with different catalysts.

| Catalyst                                            | m <sub>Catalyst</sub><br>(mg) | RhB<br>(mg/L) | Solution<br>(mL) | Time<br>(min) | Degradation<br>efficiency<br>(%) | Degradation<br>rate<br>(min <sup>-1</sup> ) | Ref          |
|-----------------------------------------------------|-------------------------------|---------------|------------------|---------------|----------------------------------|---------------------------------------------|--------------|
| TiO <sub>2</sub> -CZTS                              | 0.1                           | 7.2           | 50               | 80            | 100                              | 1×10 <sup>-2</sup>                          | [1]          |
| TiO <sub>2</sub> -CZTS                              | 40                            | 20            | 40               | 60            | 94.1                             | 5.551×10 <sup>-2</sup>                      | [2]          |
| CZTS                                                | 40                            | 4             | 100              | 100           | 83                               | 1.72×10 <sup>-2</sup>                       | [3]          |
| CZTS                                                | 10                            | 10            | 20               | 100           | 99.8                             | 4.97×10 <sup>-2</sup>                       | [4]          |
| CZTS (thin film)                                    | -                             | -             | 150              | 240           | 79                               | 0.39 (h <sup>-1</sup> )                     | [5]          |
| CZTS+TA                                             | 20                            | ~24           | 50               | 240           | 51.66                            | 0.11099 (h <sup>-1</sup> )                  | [6]          |
| CZTS                                                | 10                            | 10            | 50               | 360           | 98                               | 4×10 <sup>-2</sup>                          | [7]          |
| CZTS/La <sub>2</sub> Ti <sub>2</sub> O <sub>7</sub> | 50                            | ~8            | 100              | 60            | 95                               | -                                           | [8]          |
| CZTS                                                | 30                            | 10            | 100              | 90            | 98,2                             | 2.905×10 <sup>-2</sup>                      | This<br>work |

## References

- [1] M. A. Basit, F. Raza, Sumayya, G. Karima, I. Ali and S. Butt, *Journal of Materials Science: Materials in Electronics*, 2020, 31, 17563-17573.
- [2] A. Raza, H. Shen, A. A. Haidry, M. K. Shahzad, R. Liu and S. Cui, *Appl. Surf. Sci.*, 2020, 505.
- [3] M. Burhanuz Zaman, R. A. Mir and R. Poolla, *International Journal of Hydrogen Energy*, 2019, 44, 23023-23033.
- [4] Q.-B. Wei, P. Xu, X.-P. Ren and F. Fu, *J. Alloy. Compd.*, 2019, 770, 424-432.
- [5] M. Sampath, K. Sankarasubramanian, J. Archana, Y. Hayakawa, K. Ramamurthi and K. Sethuraman, *Materials Science in Semiconductor Processing*, 2018, 87, 54-64.
- [6] Y. Guo, J. Wei, Y. Liu, T. Yang and Z. Xu, *Nanoscale Research Letters*, 2017, 12.
- [7] S. S. Shinde, *Journal of Semiconductors*, 2015, 36.
- [8] X. Tian, J. Liu, H. Wang and H. Yan, *Crystengcomm*, 2014, 16, 8517-8522.
