# Supplementary figures and images for: The visible light-driven highly efficient photocatalytic properties of Cu2ZnSnS4 nanoparticles synthesized by a hydrothermal method
Source: Royal Society of Chemistry journal article supplement (doi:10.1039/d0nj05250g), 2020-12-14

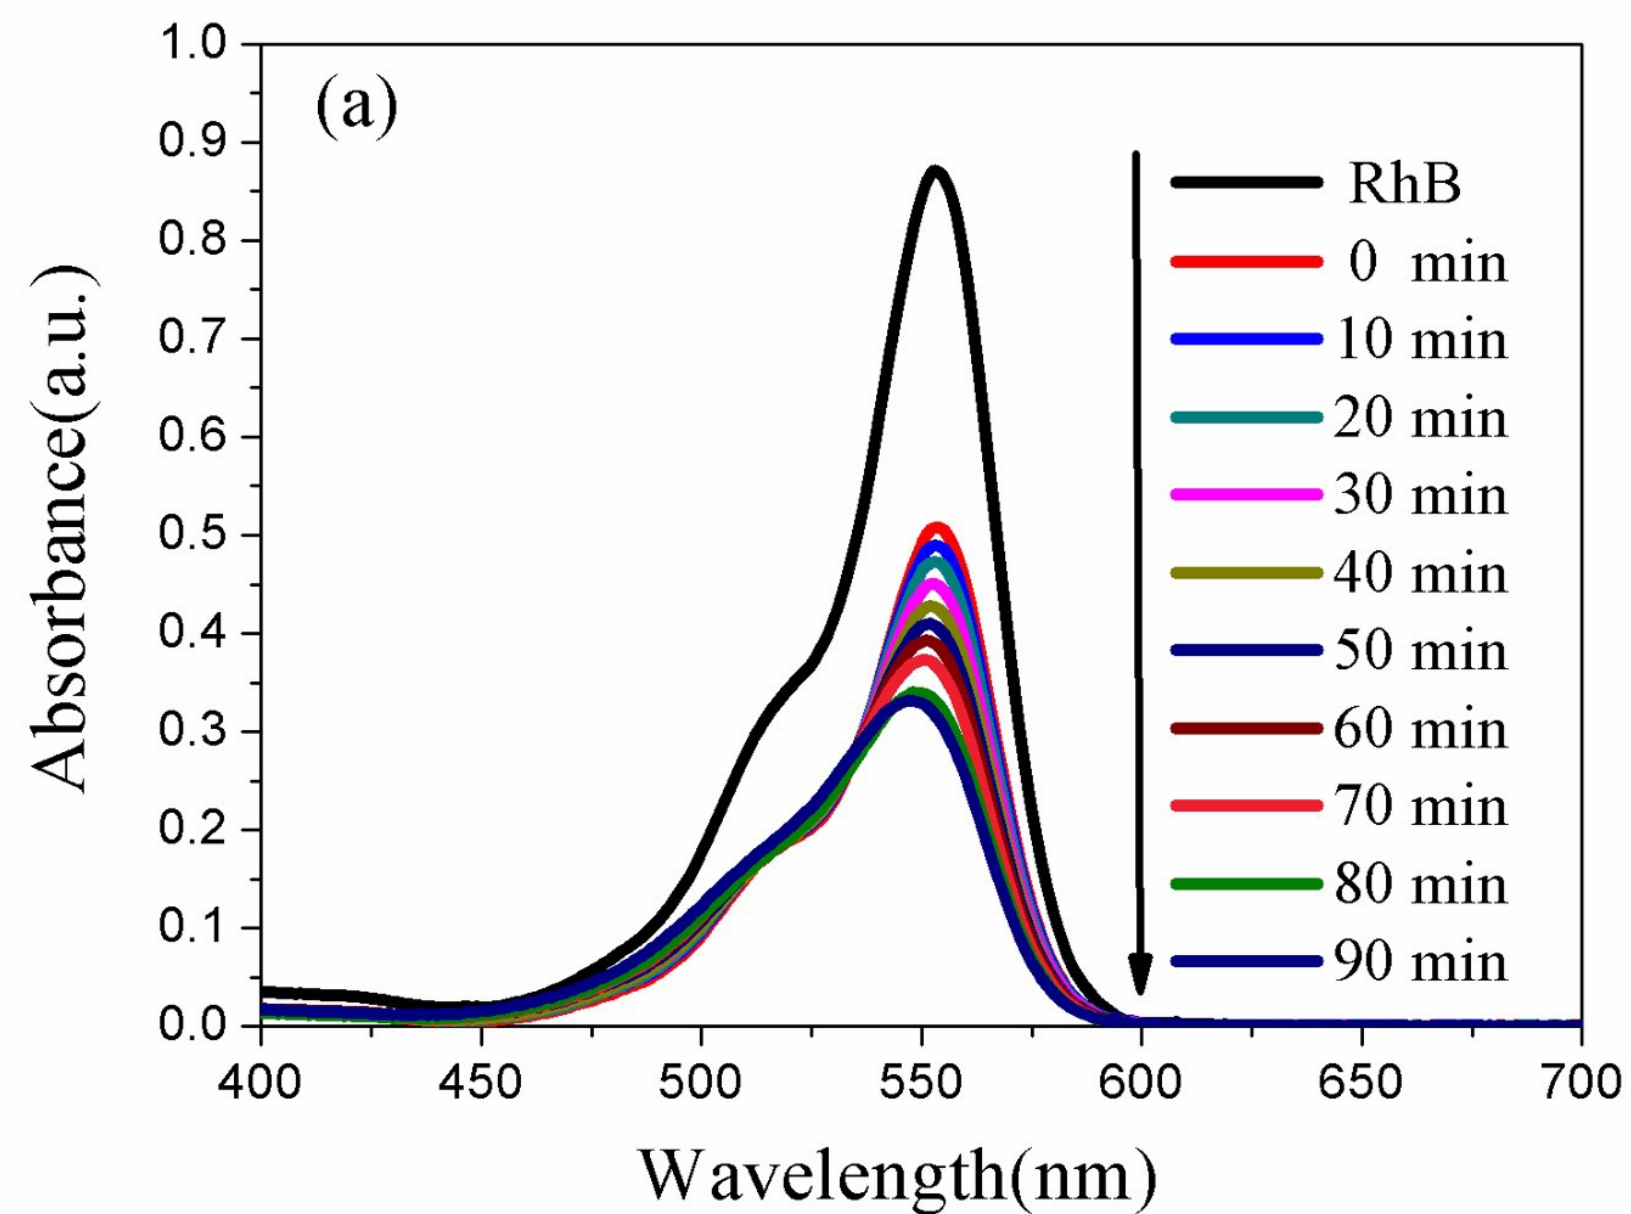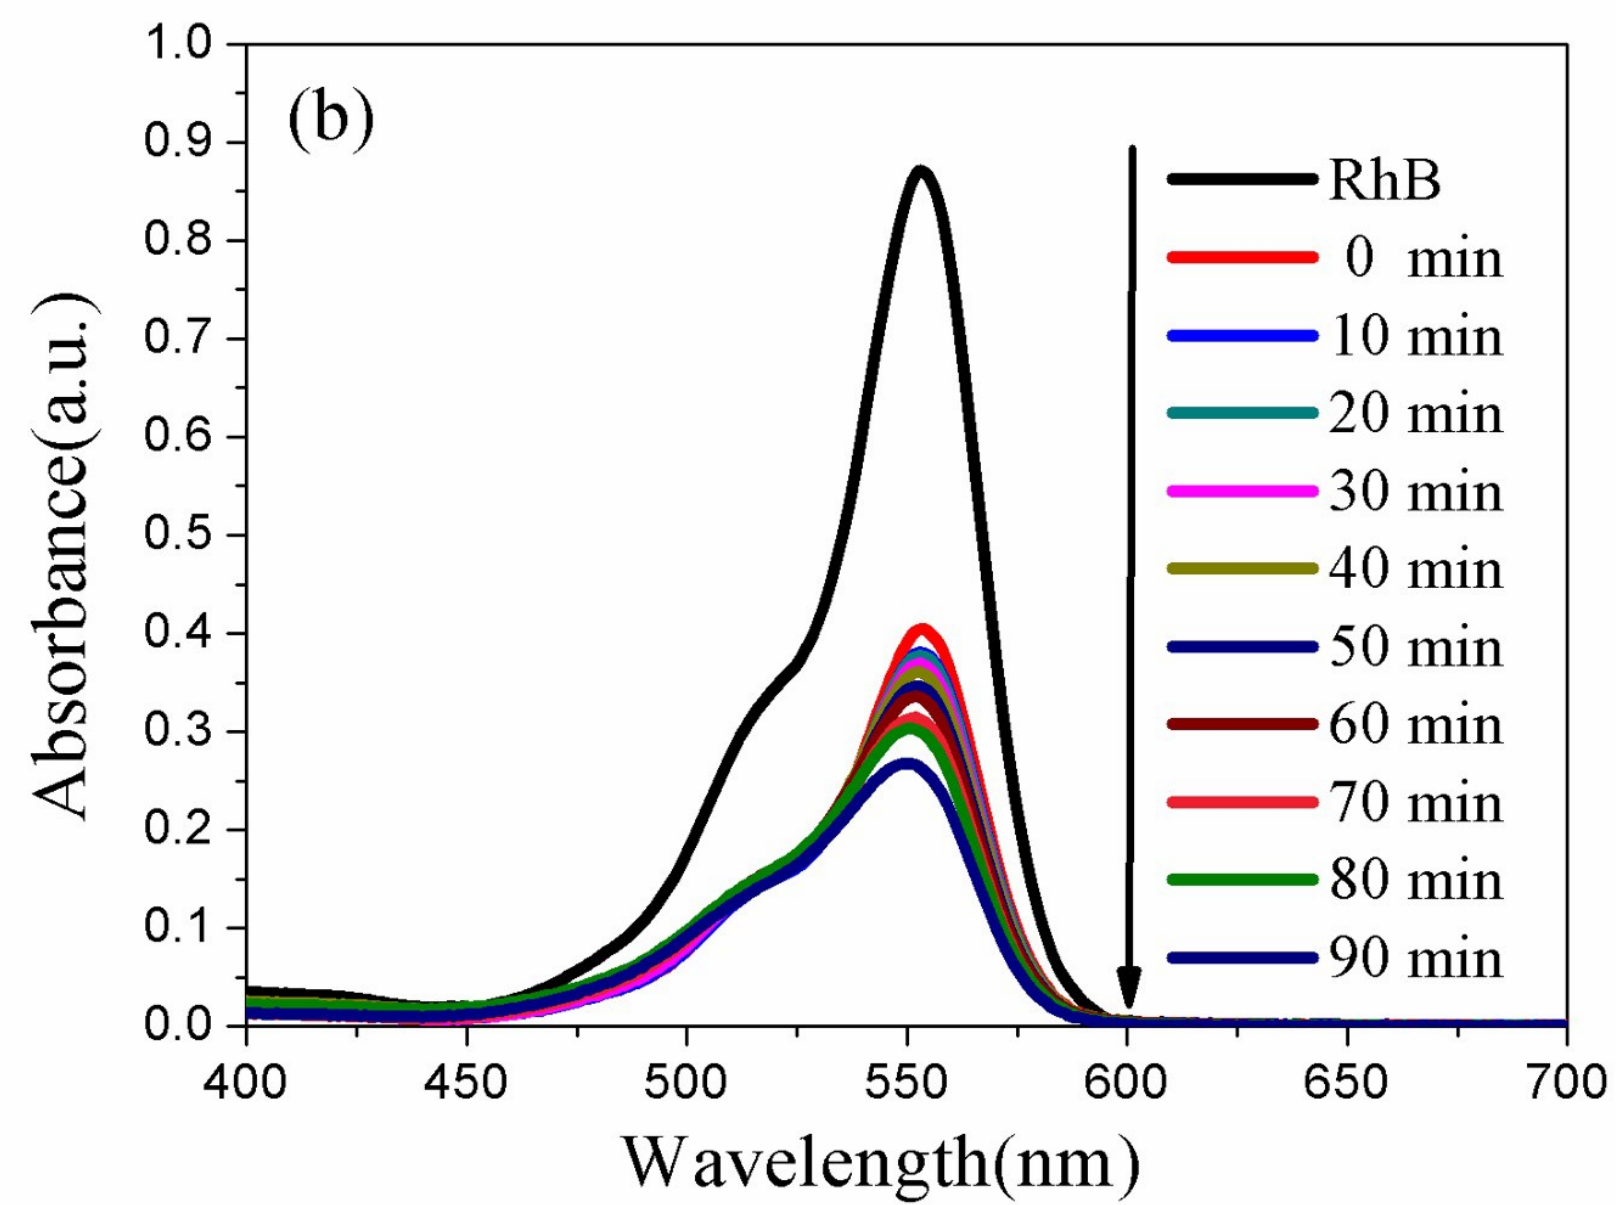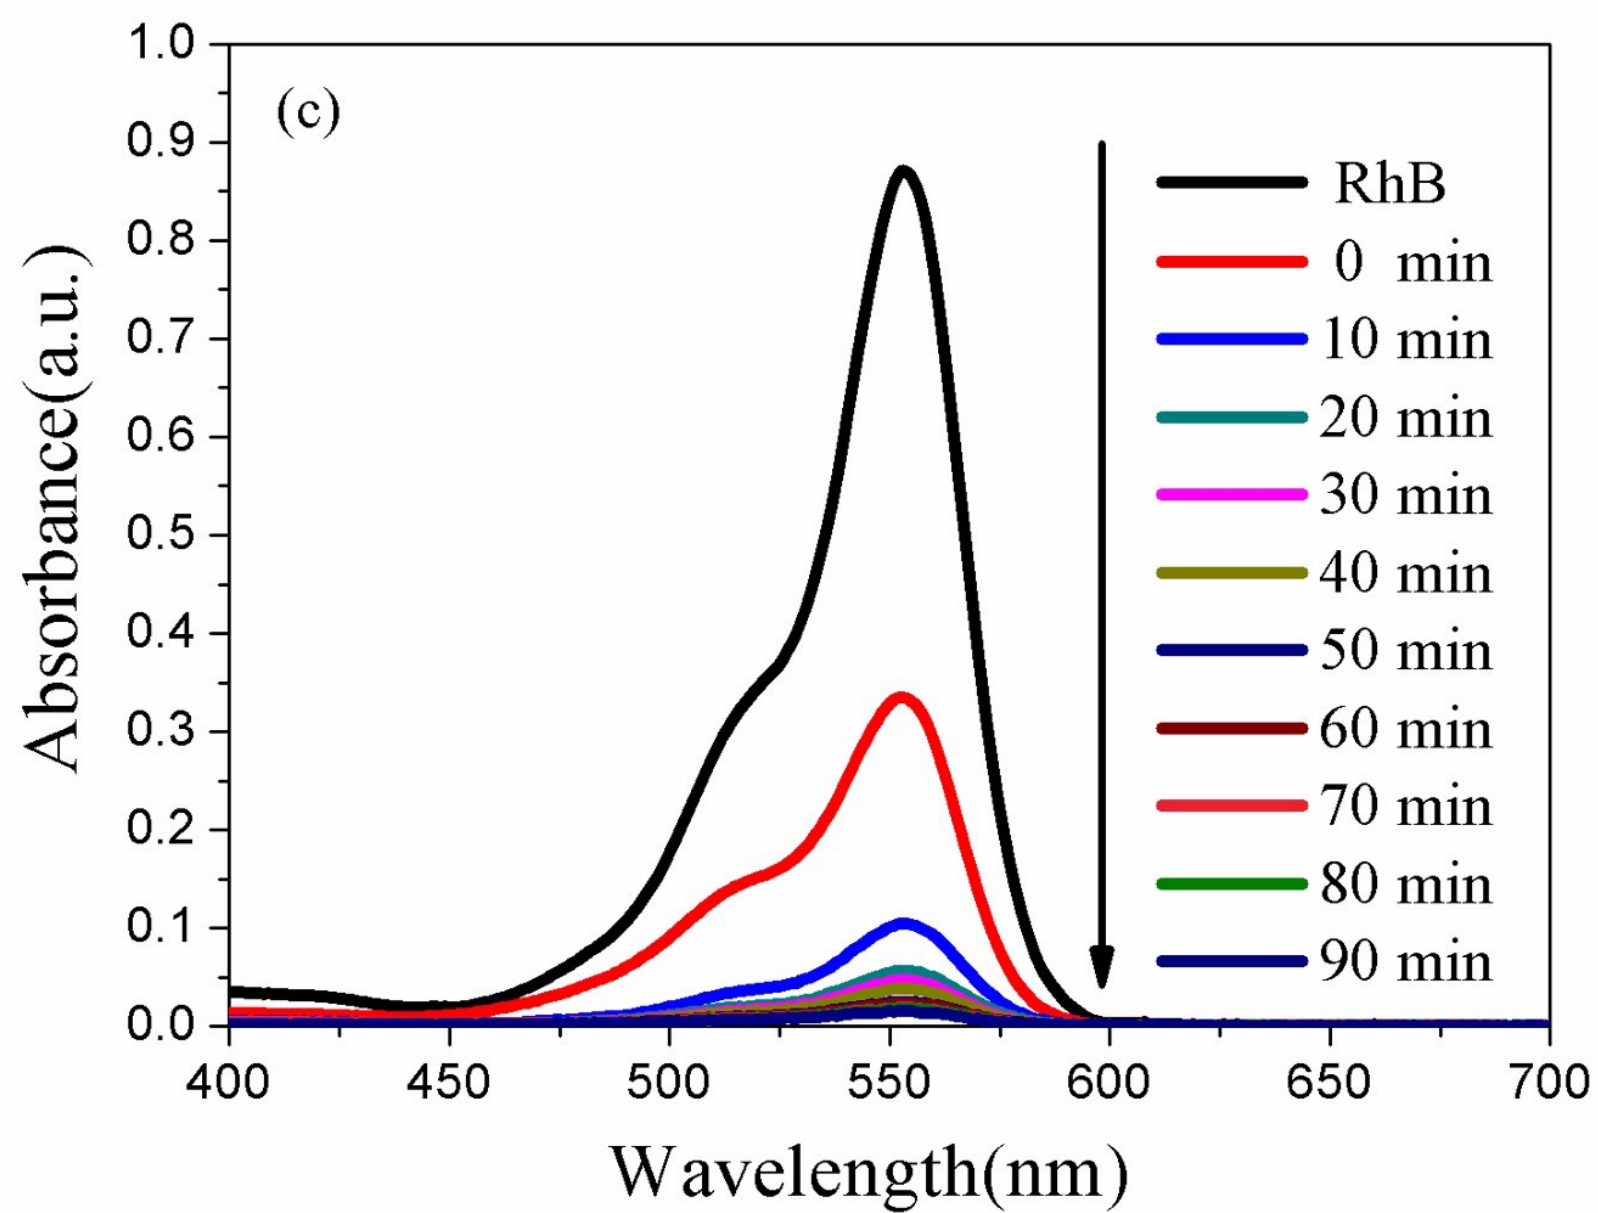

Supplement: d0nj05250g3.pdf [file d0nj05250g3.pdf]

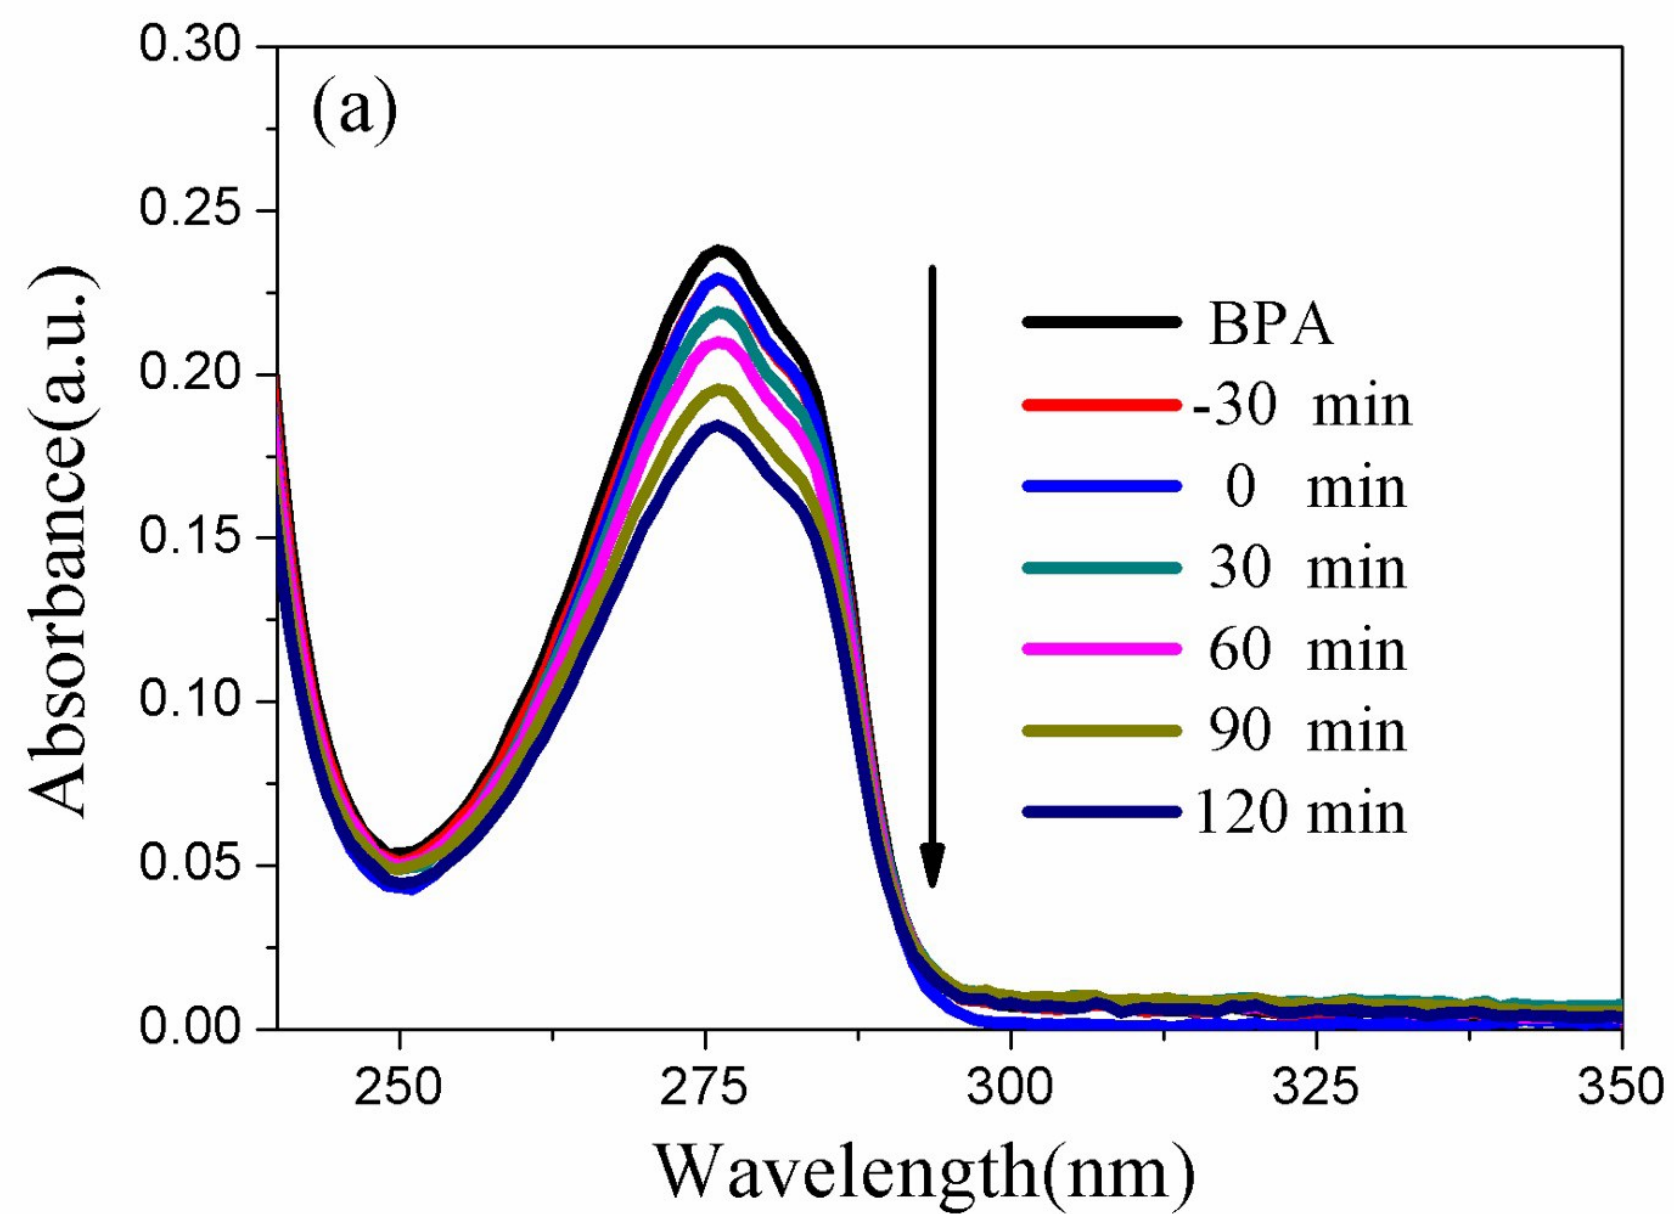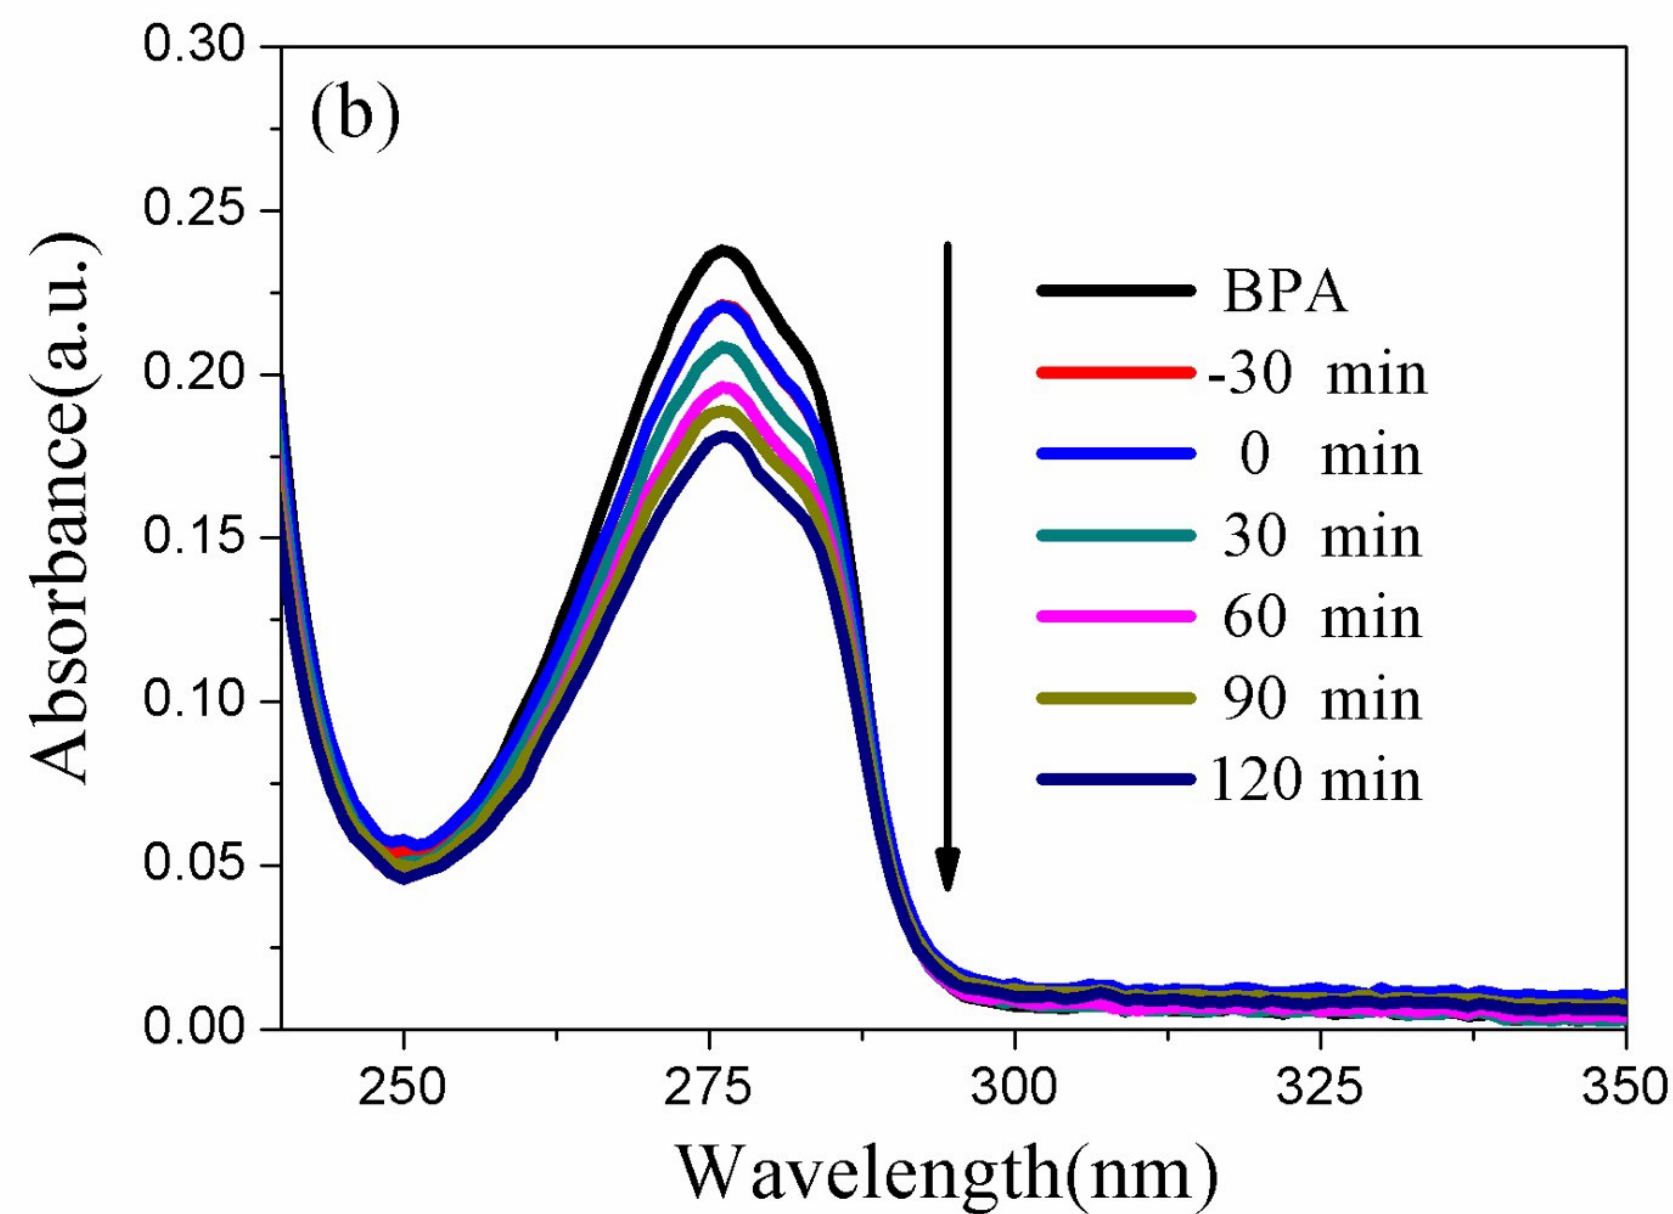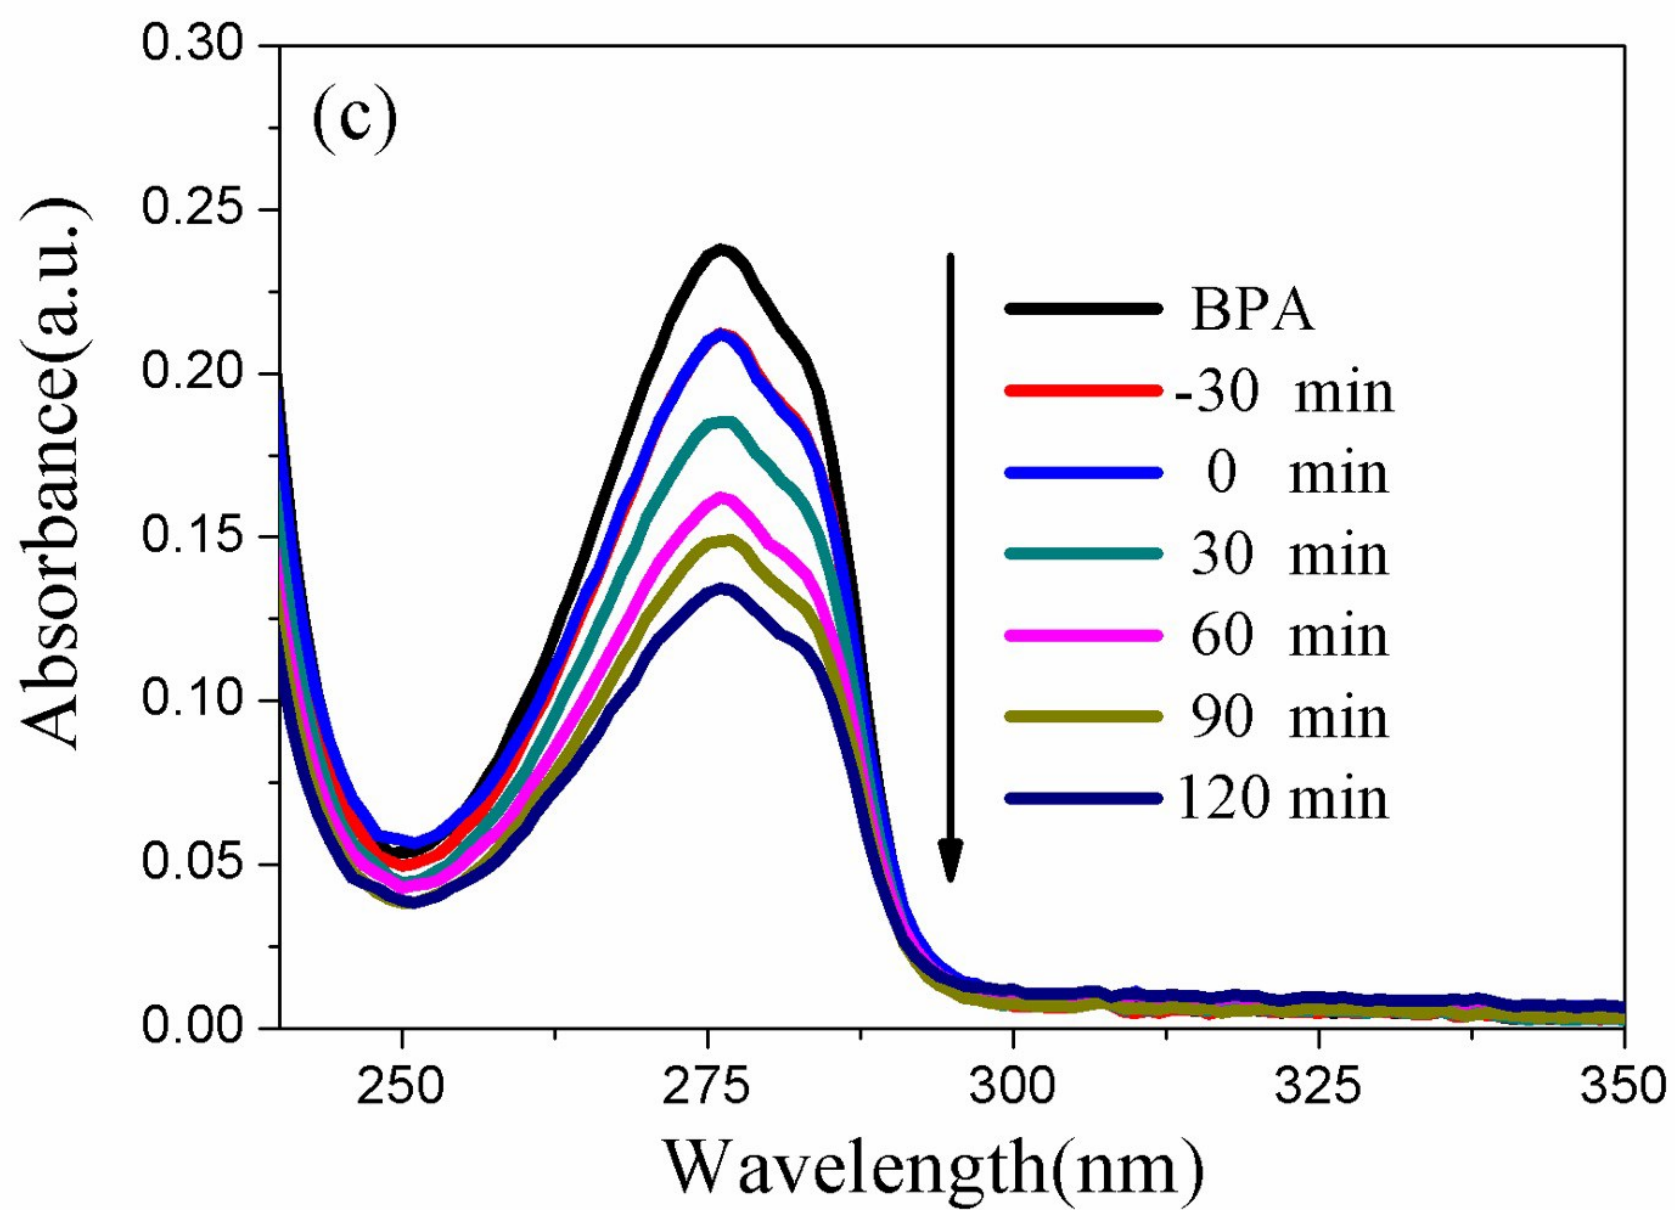

Supplement: d0nj05250g4.pdf [file d0nj05250g4.pdf]

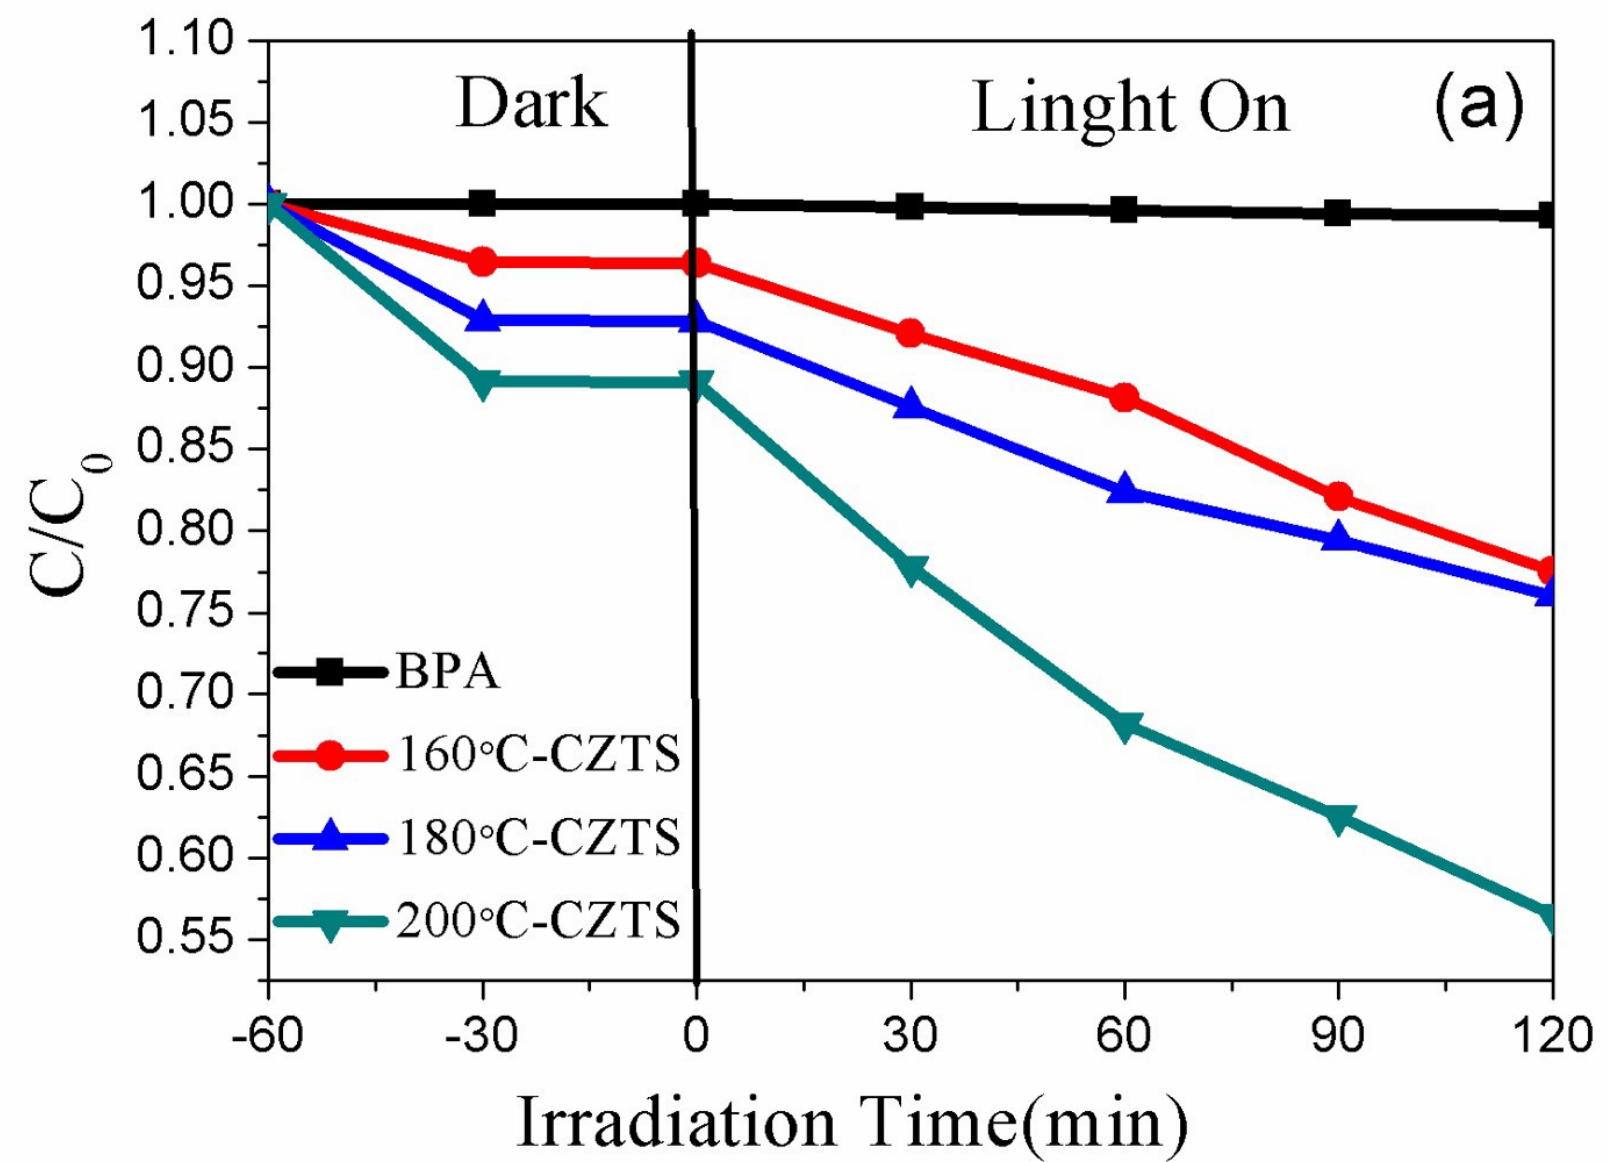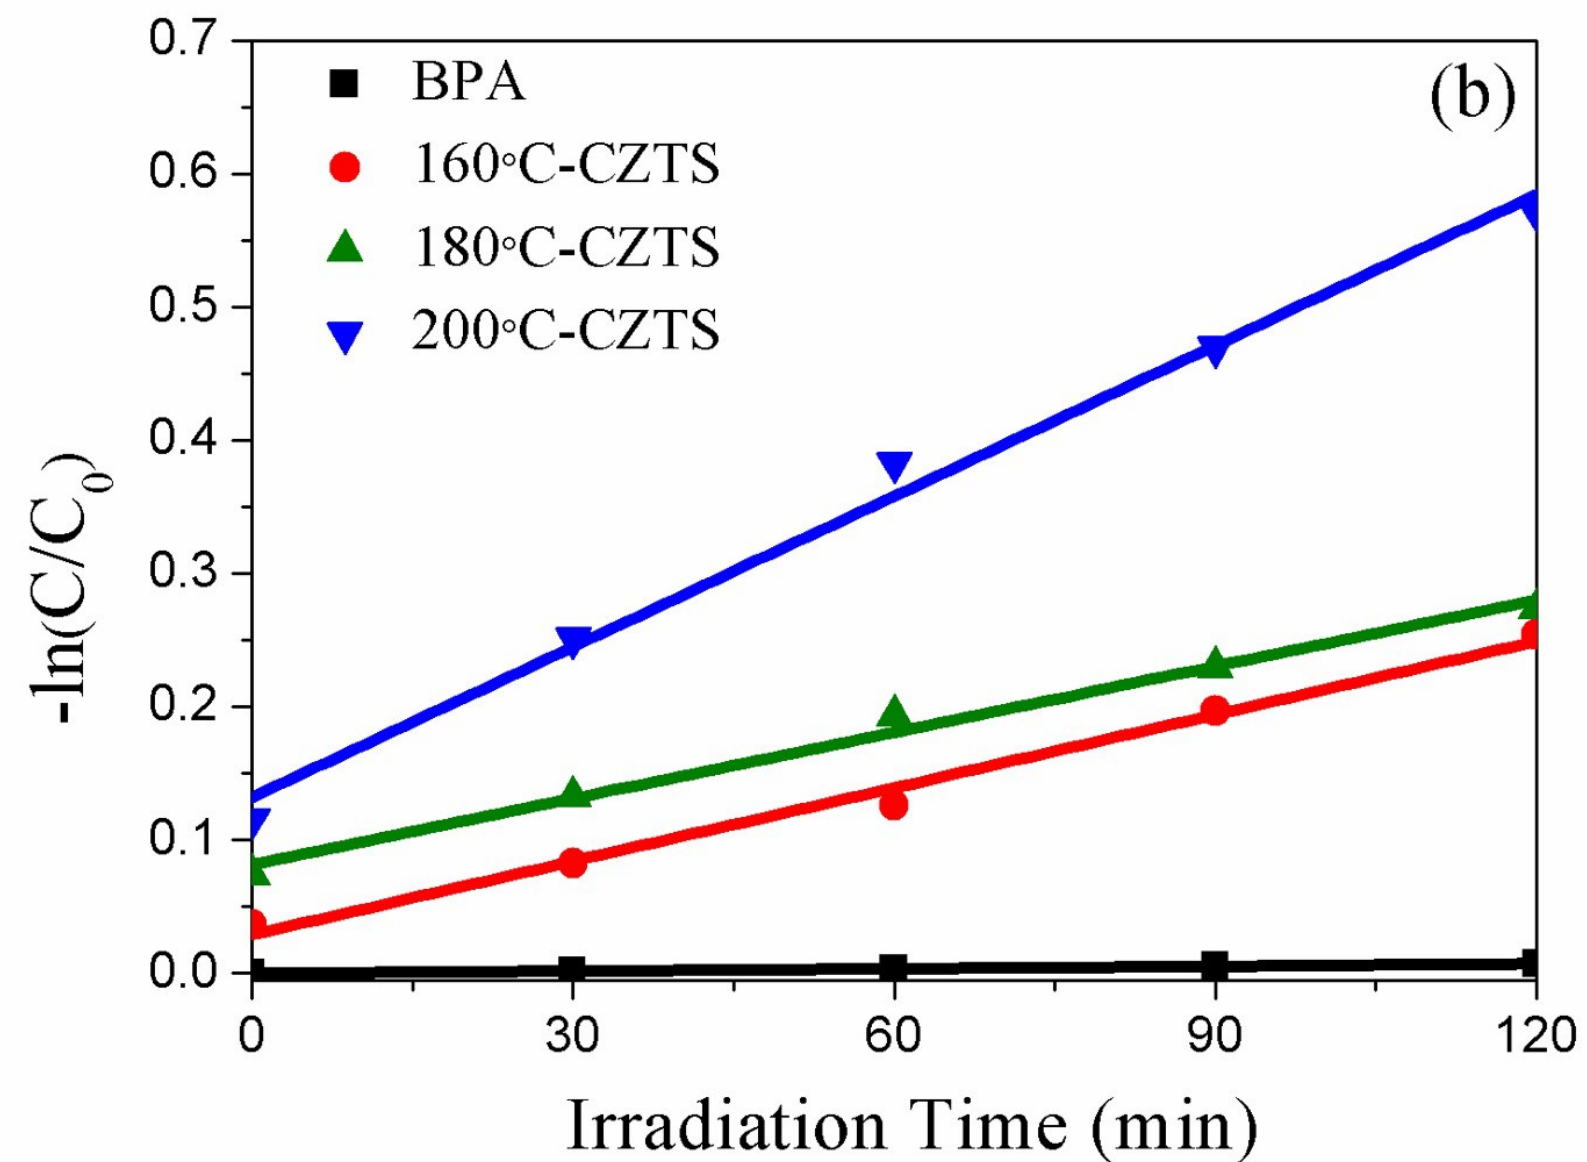

Supplement: d0nj05250g5.pdf [file d0nj05250g5.pdf]

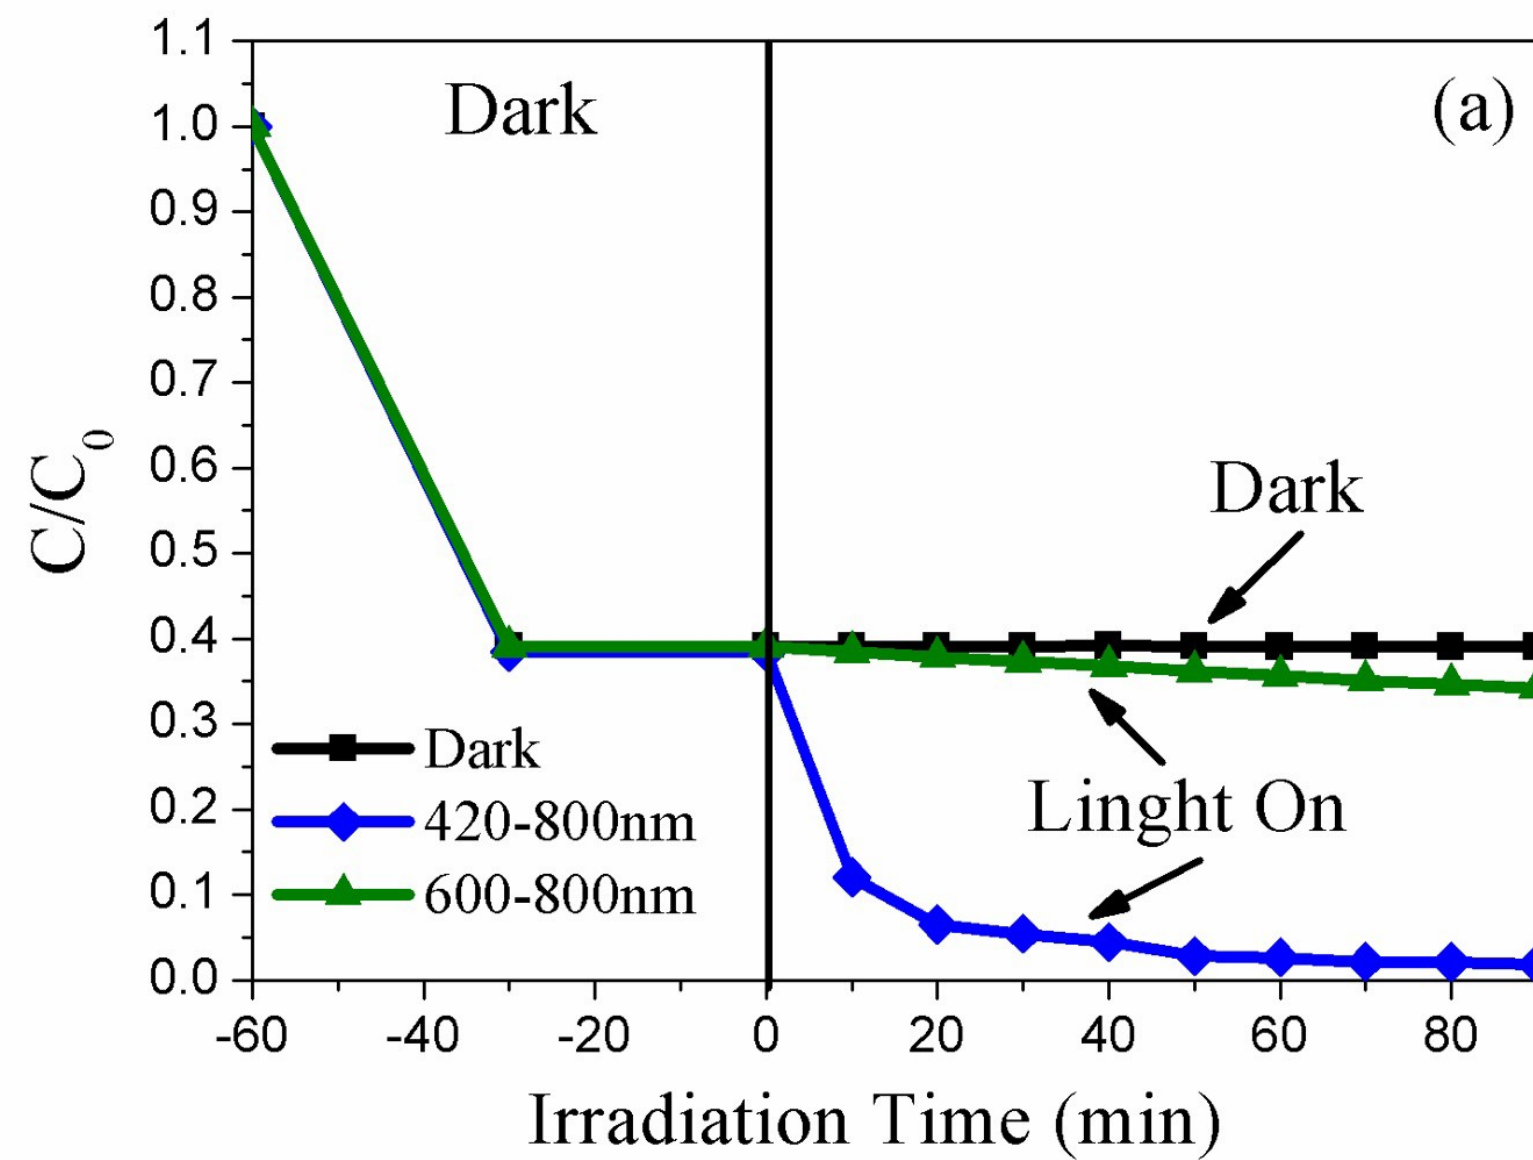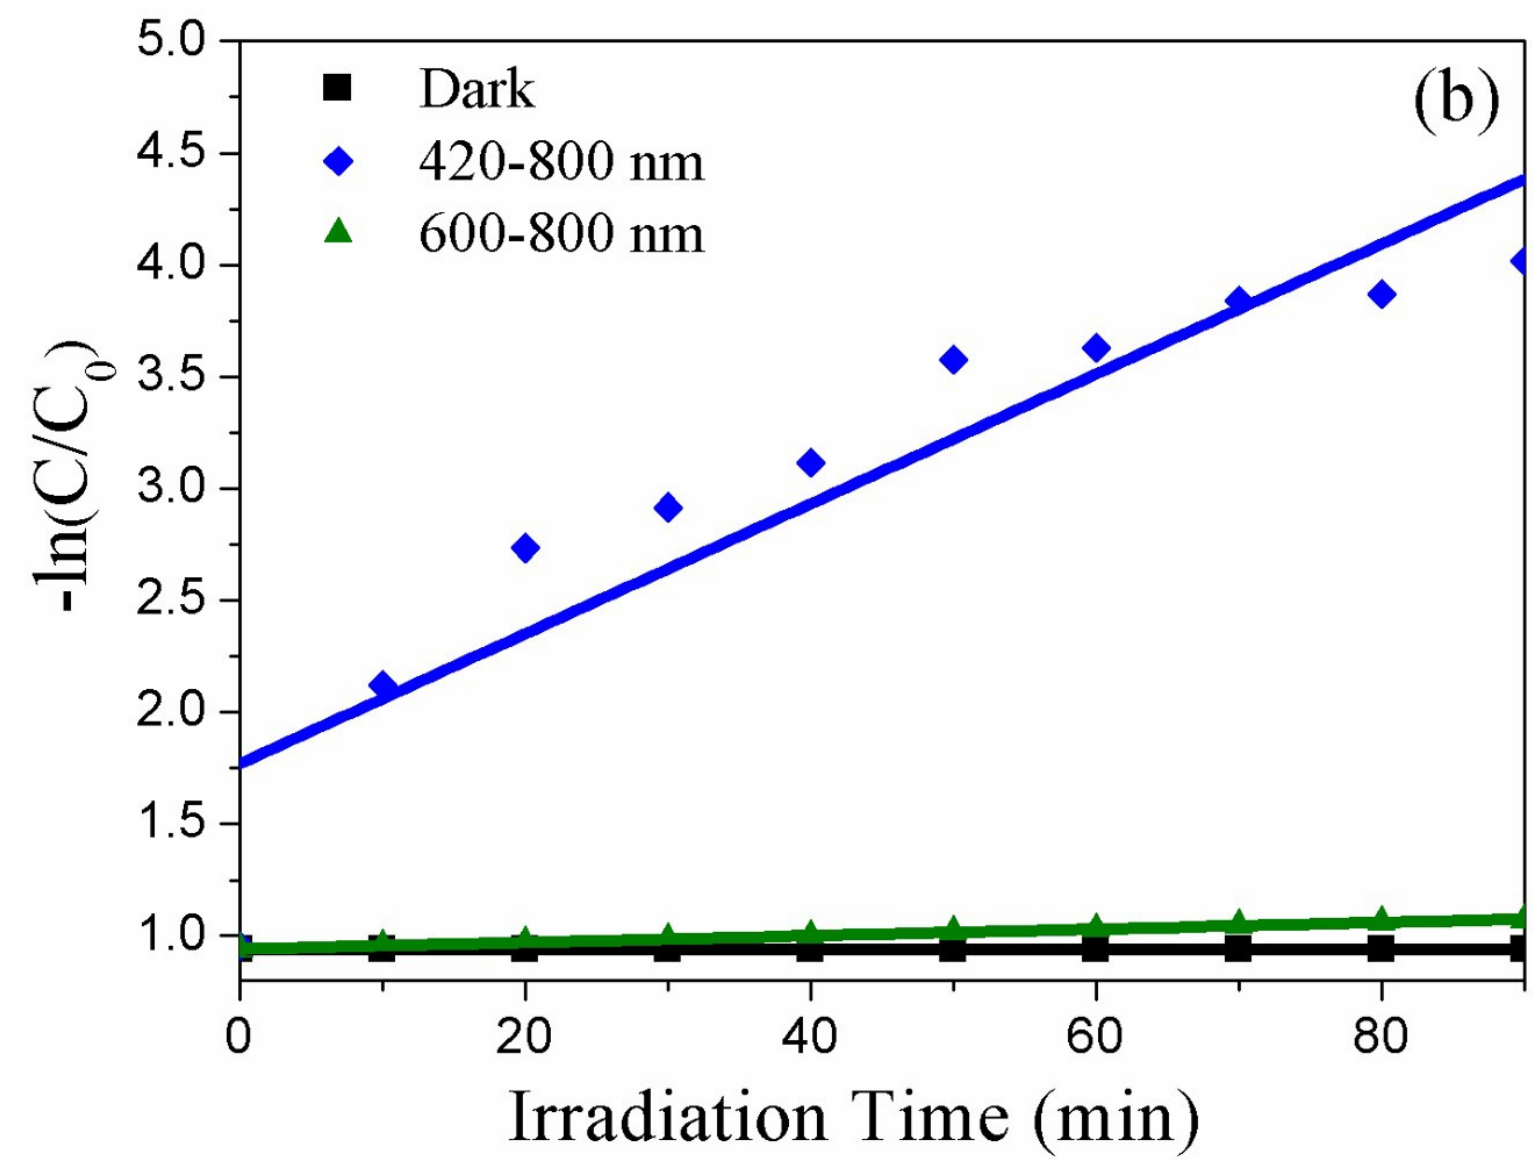

Supplement: d0nj05250g6.pdf [file d0nj05250g6.pdf]

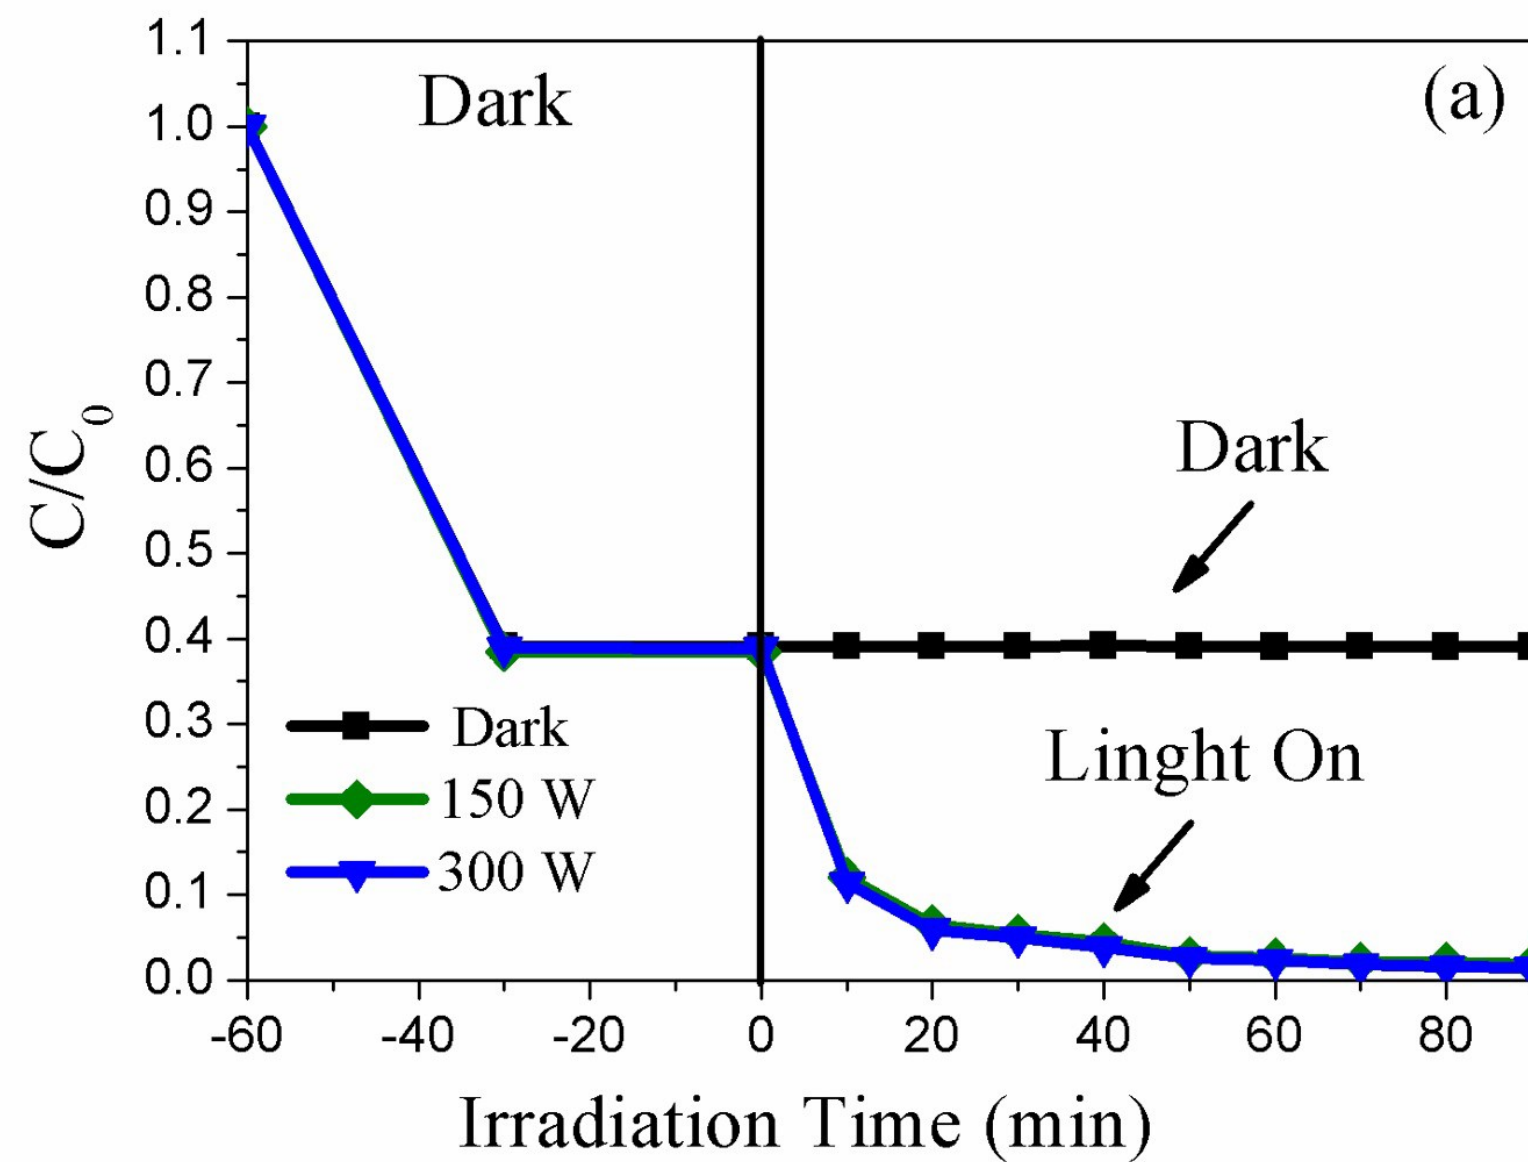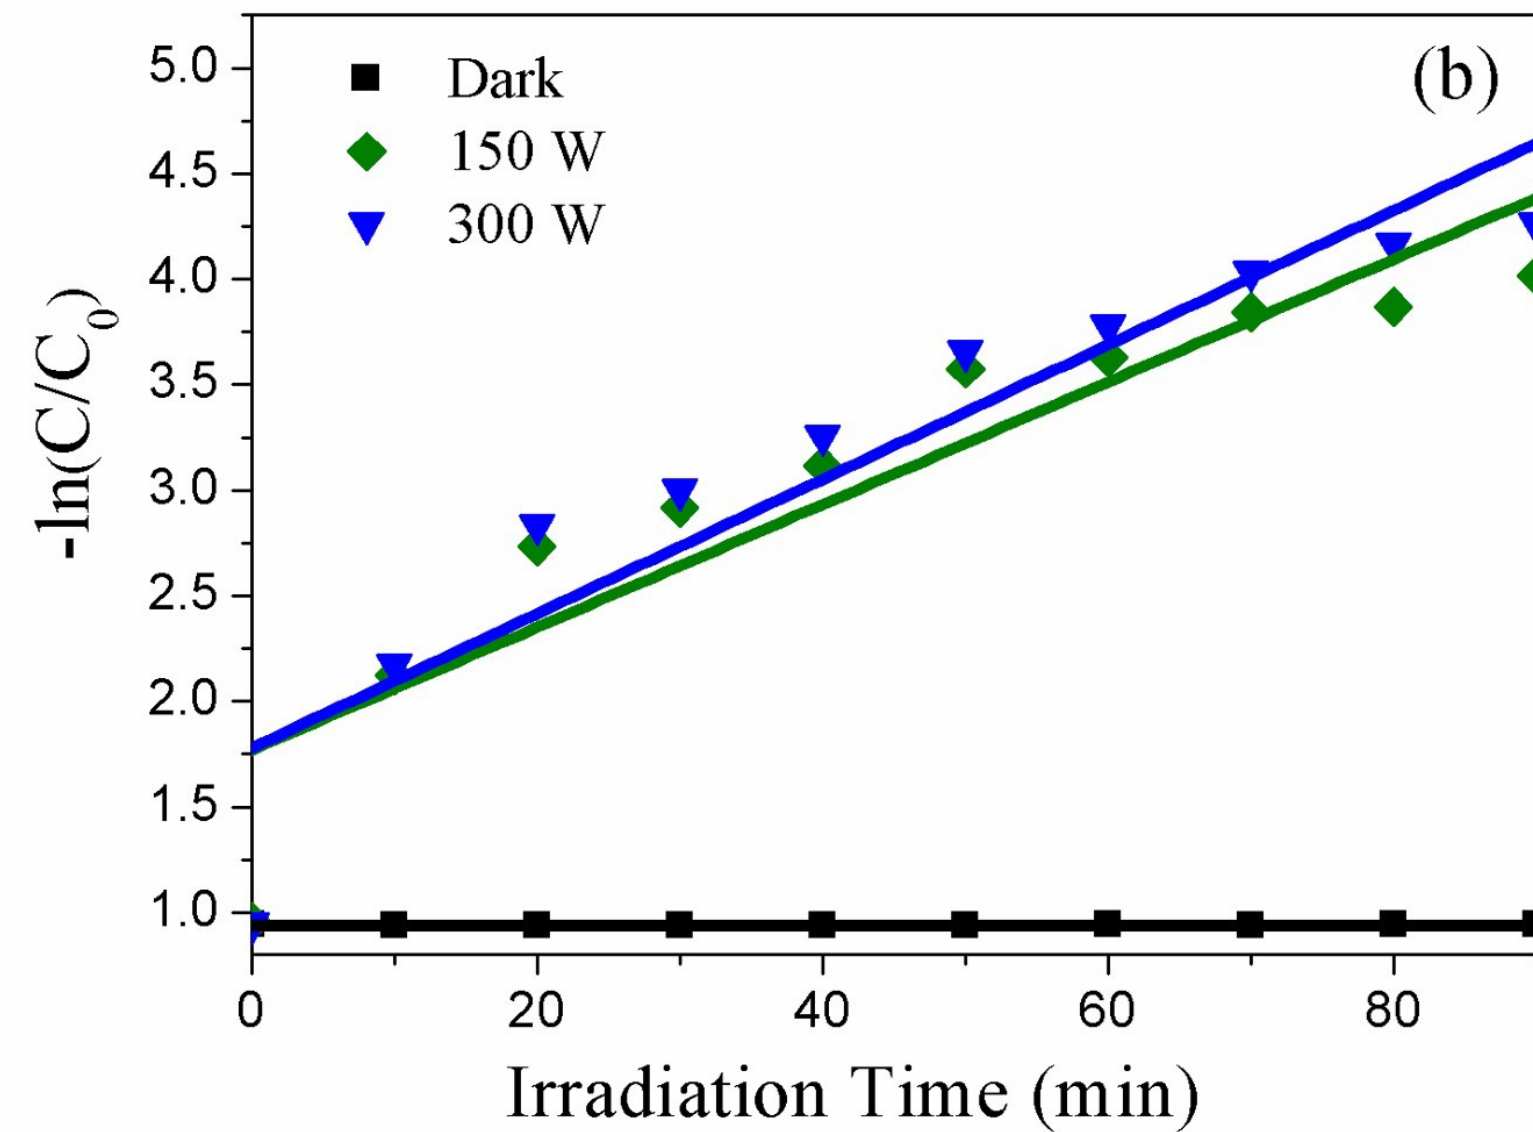

Supplement: d0nj05250g7.pdf [file d0nj05250g7.pdf]
